1 Human metapneumovirus P protein independently drives phase separation and  
2 recruits N protein to liquid-like inclusion bodies

3

4 Kerri Beth Boggs<sup>a</sup>, Nicolas Cifuentes-Munoz<sup>b</sup>, Kearstin Edmonds<sup>a</sup>, Farah El Najjar<sup>a</sup>,  
5 Conny Ossandón<sup>c</sup>, McKenna Roe<sup>a</sup>, Carole L. Moncman<sup>a</sup>, Trevor Creamer<sup>a</sup>, Rebecca  
6 Ellis Dutch<sup>a#</sup>

7

8

9 <sup>a</sup>Department of Molecular and Cellular Biochemistry, University of Kentucky  
10 College of Medicine, Lexington, KY 40536, United States

11

12 <sup>b</sup> Instituto de Ciencias Biomédicas, Facultad de Ciencias de la Salud, Universidad  
13 Autónoma de Chile, El Llano Subercaseaux 2801, San Miguel, Santiago, 8910060,  
14 Chile.

15

16 <sup>c</sup>Facultad de Ciencias del Mar y Recursos Biológicos, Universidad de Antofagasta,  
17 Chile.

18

19 #Address correspondence to Rebecca Ellis Dutch, [rebecca.dutch@uky.edu](mailto:rebecca.dutch@uky.edu).

20

21 Running Title: HMPV P-promoted phase separation

22

23

24

25

26

27

## ABSTRACT

28

29

30

31

32

33

34

35

36

37

38

39

40

41

42

43

44

45

46

47

48

Human metapneumovirus (HMPV) inclusion bodies (IBs) are dynamic structures required for efficient viral replication and transcription. The minimum components needed to form IB-like structures in cells are the nucleoprotein (N) and the tetrameric phosphoprotein (P). HMPV P binds to two versions of N protein in infected cells: C-terminal P residues interact with oligomeric, RNA-bound N (N-RNA), and N-terminal P residues interact with monomeric N (N<sup>0</sup>) to maintain a pool of protein to encapsidate new RNA. Recent work on other negative-strand viruses has suggested that IBs are liquid-like organelles formed via liquid-liquid phase separation (LLPS). Here, HMPV IBs in infected or transfected cells were shown to possess liquid organelle properties, such as fusion and fission. Recombinant versions of HMPV N and P proteins were purified to analyze the interactions required to drive LLPS *in vitro*. Purified HMPV P was shown to form liquid droplets in the absence of other protein binding partners, a novel finding compared to other viral systems. Removal of nucleic acid from purified P altered phase separation dynamics, suggesting that nucleic acid interactions also play a role in IB formation. HMPV P also recruits monomeric N (N<sup>0</sup>-P) and N-RNA to IBs *in vitro*. These findings suggest that, in contrast to what has been reported for other viral systems, HMPV P acts as a scaffold protein to mediate multivalent interactions with monomeric and oligomeric HMPV N to promote phase separation of IBs.



50

## IMPORTANCE

51 Human metapneumovirus (HMPV) is a leading cause of respiratory disease among  
52 children, immunocompromised individuals, and the elderly. Currently, no vaccines or  
53 antivirals are available for treatment of HMPV infections. Cytoplasmic inclusion bodies  
54 (IBs), where HMPV replication and transcription occur, represent a promising target for  
55 the development of novel antivirals. The HMPV nucleoprotein (N) and phosphoprotein  
56 (P) are the minimal components needed for IB formation in eukaryotic cells. However,  
57 interactions that regulate the formation of these dynamic structures are poorly  
58 understood. Here, we showed that HMPV IBs possess the properties of liquid organelles  
59 and that purified HMPV P phase separates independently *in vitro*. Our work suggests  
60 that HMPV P phase separation dynamics are altered by nucleic acid. We provide strong  
61 evidence that, unlike results reported from other viral systems, HMPV P alone serves  
62 as a scaffold for multivalent interactions with monomeric (N<sup>0</sup>) and oligomeric (N-RNA)  
63 HMPV N for IB formation.

64

65

66

## INTRODUCTION

67 Human metapneumovirus (HMPV), discovered in 2001, is a leading cause of  
68 severe respiratory tract infections in infants, the elderly, and immunocompromised  
69 individuals (1). Five to twenty percent of hospitalizations from respiratory infections in  
70 young children are due to HMPV (2, 3). Symptoms of HMPV infection are similar to  
71 respiratory syncytial virus (RSV) and include fever, cough, rhinorrhea, croup,  
72 bronchiolitis, pneumonia, and asthma exacerbation (4). HMPV and RSV are members  
73 of the *Pneumoviridae* family, a viral family which was created in 2016 and classified  
74 within the *Mononegavirales* order (5). Currently, no vaccines or antiviral treatments are  
75 approved to treat HMPV infections, so most patients are managed with supportive care  
76 (4). The recent discovery of HMPV highlights the need to understand the basic  
77 mechanisms of its life cycle. Specifically, analyzing the process of HMPV replication  
78 may be crucial for identifying new targets for antiviral development.

79 Along with the pneumoviruses HMPV and RSV, other relevant human pathogens  
80 within the *Mononegavirales* order include Ebola virus, measles virus (MeV), and rabies  
81 virus (RABV), which have negative-sense, single-stranded RNA genomes. Though  
82 these viruses are classified within different families, they have all been reported to form  
83 membrane-less cytoplasmic structures within infected cells known as inclusion bodies  
84 (IBs) (6-9). For some negative-sense, single-stranded RNA viruses, including HMPV,  
85 IBs have been shown to house active viral replication and transcription (10-18). These  
86 processes involve several viral proteins, such as the large RNA-dependent RNA-  
87 polymerase (L), phosphoprotein (P), and nucleoprotein (N). Further analysis of these  
88 structures has shown that RSV, MeV, RABV, and vesicular stomatitis virus (VSV) IBs  
89 possess the properties of liquid organelles formed via liquid-liquid phase separation

90 (LLPS) (11, 19-22). LLPS is a physical process by which a homogenous fluid separates  
91 into two distinct liquid phases (23). Phase separation plays a role in the formation of a  
92 variety of membrane-less cellular compartments, such as processing bodies (P-bodies),  
93 stress granules, and nucleoli, to concentrate specific proteins and nucleic acids,  
94 particularly RNA (24). Properties that define these structures as liquid organelles include  
95 the ability to undergo fusion and fission, rapid diffusion of internal contents, and a  
96 spherical shape due to surface tension (25). Though LLPS has been shown to play a  
97 role in the formation of IBs for some viruses, the physical mechanisms and materials  
98 that mediate this process in the viral life cycle are still poorly understood.

99 For RSV, HMPV, MeV, and RABV, the minimum viral components required to  
100 reconstitute IB-like structures in cells are the N protein, which encapsidates the RNA  
101 genome, and the P protein, which acts as a cofactor to mediate interactions between N  
102 and L (11, 20, 26, 27). VSV also requires the presence of the L protein with the N and  
103 P proteins to form IBs (19). These findings suggest that interactions between the N and  
104 P proteins regulate phase separation to form IBs as a structural platform for viral  
105 replication and transcription. Most studies thus far have focused on cellular experiments  
106 to investigate viral IB liquid dynamics, but recent publications on MeV and RSV have  
107 shown the importance of utilizing purified protein systems to analyze interactions  
108 between the N and P proteins *in vitro* (21, 22). For MeV, the purified P protein and  
109 monomeric N protein failed to phase separate independently but formed liquid droplets  
110 when mixed, similar to the requirements for IB formation observed in cells. Interestingly,  
111 when RNA was added to MeV N/P liquid droplets, it incorporated into the droplets and  
112 led to the formation of nucleocapsid-like particles that were detected by electron  
113 microscopy (21). *In vitro* experiments with RSV proteins showed that RNA-bound N

114 protein rings and P protein form phase separated liquid droplets when combined in  
115 solution (22). These findings support the model that viral IBs form via LLPS, and this  
116 mechanism is highly dependent upon interactions between the N and P proteins. This  
117 process may enhance viral replication and transcription for RSV.

118 The HMPV life cycle begins with the virus attaching and fusing to a target cell to  
119 release its ribonucleoprotein into the cytoplasm. The ribonucleoprotein structure  
120 protects the genome from host nucleases and acts as a template for the L protein. The  
121 genome is used to generate capped and poly-adenylated viral mRNA transcripts that  
122 are translated by the host cell ribosomal machinery. The genome is also replicated to  
123 make positive-sense antigenome copies that can then be used to generate more  
124 negative-sense genome to package into new virions. The P protein acts as an adaptor  
125 to regulate interactions between the polymerase and RNA template during transcription  
126 and replication. It functions as a tetrameric protein, in which the monomers interact  
127 through a central oligomerization domain (28, 29). The oligomerization domain is flanked  
128 by large intrinsically disordered regions (IDRs) that give HMPV P the ability to interact  
129 with a variety of binding partners (28). For instance, the C-terminus of the P protein  
130 interacts with RNA-bound N protein to chaperone attachment to the polymerase.  
131 Additionally, HMPV P maintains a monomeric pool of RNA-free N protein ( $N^0$ ) through  
132 an interaction involving the HMPV P N-terminus with the C-terminal domain of the N  
133 protein (30). The monomeric  $N^0$  protein can then be used for ribonucleoprotein assembly  
134 at sites of replication where the polymerase synthesizes nascent RNA (30). HMPV P  
135 also recruits the antitermination factor M2-1 to the polymerase during transcription to  
136 bind nascent viral mRNA (31). Structural analysis of the HMPV polymerase/P protein  
137 complex showed the versatility of P monomer interactions with the polymerase,

138 suggesting that P protein IDRs modulate a variety of polymerase functions as well (32).  
139 Beyond transcription and replication, HMPV P has been shown to play a role in direct  
140 cell-to-cell spread of infection by interacting with actin, or an actin-binding protein, to  
141 reorganize the host cell cytoskeleton (33).

142 This is the first report to analyze phase separation for HMPV IBs. We utilize  
143 cellular and purified protein systems to analyze LLPS of HMPV proteins to support the  
144 characterization of HMPV IBs as liquid organelles and to determine the interactions  
145 required for phase separation. We report that HMPV IBs are liquid-like membrane-less  
146 structures that rely on N/P protein interactions. Our *in vitro* data shows that HMPV N  
147 and P undergo phase separation and colocalize within liquid droplets when they are  
148 mixed in solution. In contrast to MeV and RSV, the HMPV P protein undergoes phase  
149 separation in the absence of other viral protein binding partners *in vitro*, suggesting that  
150 the P protein may be the key protein to mediate protein interactions to promote IB  
151 formation during infection. WT RNA-bound N protein rings formed aggregates in solution  
152 but incorporated into liquid droplets in the presence of P protein. These findings suggest  
153 for the first time that HMPV P acts as a scaffold protein to support multivalent  
154 interactions with HMPV N to promote phase separation and IB formation.

155

156

157

## MATERIALS AND METHODS

158           **Construction of a recombinant HMPV-mCherryP virus.** The plasmids  
159 encoding the full-length genome sequence of HMPV strain JPS02-76 (p+JPS07E2) and  
160 the accessory proteins N, M2-1, L and P (pCITE-76N, -76M2-1, -76L and -76P) were  
161 kindly provided by Dr. Makoto Takeda (National Institute of Infectious Diseases, Tokyo)  
162 (34). To insert the mCherryP cassette within the p+JPS07E2 plasmid, a vector  
163 containing the partial sequence of N followed by the N-terminus mCherry tagged P  
164 sequence, flanked by NheI and SacI restriction sites, was synthesized (GenScript). The  
165 sequence within this vector was then subcloned into p+JPS07E2 using the NheI and  
166 SacI restriction sites. The correct insertion of the cassette into the plasmid was verified  
167 by sequencing. To rescue the recombinant HMPV virus, the methodology described by  
168 Shirogane et al. (34) was used. Briefly, BSR cells stably expressing the T7 RNA  
169 polymerase were transfected with plasmids p+JPS07E2, pCITE-76N, -76M2-1, -76L  
170 and -76P using lipofectamine3000, following manufacturer instructions. Forty-eight  
171 hours post-transfection the cells were scrapped from the plate onto the media, and half  
172 of the volume overlaid onto a monolayer of Vero cells, in Optimem with TPCK-Try 0.3  
173 µg/mL. Media was replaced every other day until extensive cytopathic effect and  
174 fluorescent signal was observed. Cells and media were then recovered and used to  
175 propagate the passage 1 of the recombinant virus in Vero cells, as previously described.

176           **Fluorescence recovery after photobleaching (FRAP).** Vero cells were  
177 transfected with pCAGGS plasmid expressing mcherry-P only (P) or co-transfected with  
178 pCAGGS plasmids encoding mCherry-P and N protein (P+N). Twenty-four hours post  
179 transfection, live cell confocal microscopy was used to perform FRAP at 37°C on  
180 punctate regions by drawing a region of interest (ROI) representing a whole inclusion

181 body or an equivalent area in the cytosol with P protein only. Imaging was completed on  
182 the Nikon A1R confocal, using a Plan Fluor 40x Oil DIC objective. For photobleaching a  
183 laser wavelength of 405nm with a laser power setting of 100% was utilized. Each  
184 experiment used 5 seconds of pre-bleaching acquisition, with 4-5 minutes of recovery.

185 **Expression and purification of HMPV P.** The CAN97-83 HMPV P construct  
186 was cloned into the plasmid pET 302/NT-His between the cleavage sites EcoRI and  
187 XhoI and expressed in BL21(DE3) CodonPlus RIL cells (Agilent) overnight at 37 °C in  
188 terrific broth (TB) containing ampicillin after induction at an optical density (OD) of 1.4  
189 with 1 mM isopropyl-  $\beta$ -d-thiogalactopyranoside (IPTG). Cells were lysed with 20 mM  
190 Tris, 200 mM NaCl, pH 7.5 containing cOmplete EDTA-free protease inhibitor cocktail  
191 (Sigma) and 125  $\mu$ g/mL lysozyme. After incubating on ice for 20 min, the solution was  
192 sonicated three times at 60% intensity for 15 sec. The lysate was spun at 18,000 rpm  
193 for 30 min at 4 °C. The crude lysate rocked with HIS-select nickel affinity gel resin  
194 (Sigma) for 45 min at 4 °C. The resin was washed one time with lysis buffer and two  
195 times with 20 mM Tris, 200 mM NaCl, 20 mM imidazole, pH 7.5. The protein was eluted  
196 with 20 mM Tris, 200 mM NaCl, 250 mM imidazole, pH 7.5. The eluate was loaded onto  
197 a HiTrap Q HP anion exchange chromatography column (Cytiva). The column was  
198 washed with 20 mM Tris, pH 7.5. Then, fractions were eluted with 20 mM Tris, 1 M NaCl,  
199 pH 7.5. The fractions containing HMPV P were concentrated and buffer exchanged into  
200 25 mM HEPES, 150 mM KCl, pH 7.5 using a PD-10 desalting column with Sephadex  
201 G-25 resin (GE Healthcare).

202 To reduce nucleic acid binding, some HMPV P lysates were treated with  
203 Benzonase during the cell lysis step. Instead of anion exchange, the HIS-select  
204 purification was followed by heparin purification using a HiTrap Heparin HP column with

205 an increasing NaCl gradient from 200 mM to 1M prior to buffer exchange with the PD-  
206 10 column. After buffer exchange, the protein was concentrated, flash frozen, and stored  
207 at -80°C.

208 **Expression and purification of HMPV N<sup>0</sup>-P.** The CAN97-83 HMPV N<sup>0</sup>-P  
209 construct with a 6X C-terminal His6-tag was synthesized by GenScript in the pET-29b(+)  
210 plasmid and cloned between the NdeI and KpnI cleavage sites. The construct was  
211 expressed in *E. coli* Rosetta 2(DE3) competent cells (Novagen) overnight at 18°C in TB  
212 containing kanamycin after induction at OD 0.8 with IPTG. Cells were lysed (20 mM Tris,  
213 500 mM NaCl, 10 mM imidazole, pH 7, protease inhibitor, lysozyme, 250 units of  
214 Benzonase (Sigma)) and incubated on ice for 20 min. The solution was sonicated and  
215 spun as described above except the lysate spun for 45 min. The crude lysate was  
216 incubated with resin as described above. The resin was washed once with 20 mM Tris,  
217 500 mM NaCl, 10 mM imidazole, pH 7, twice with 20 mM Tris, 500 mM NaCl, pH 7, and  
218 the protein was eluted with 20 mM Tris, 500 mM NaCl, 300 mM imidazole, pH 7. The  
219 eluate was concentrated and buffer exchanged into 25 mM HEPES, 150 mM KCl, pH  
220 7.5. The protein was concentrated and stored as described above.

221 **Expression and purification of HMPV N-RNA.** The CAN97-83 HMPV N  
222 construct with a 6X C-terminal His6-tag was synthesized and cloned into pET-29b(+) as  
223 described above. The construct was expressed and induced as described for N<sup>0</sup>-P. Cells  
224 were lysed (25 mM Tris, 1 M NaCl, pH 8, protease inhibitor, lysozyme, Benzonase) and  
225 treated as described above except the lysate spun for 1 hr. The crude lysate was loaded  
226 onto a column containing pre-equilibrated resin at 4°C, washed two times (25 mM Tris,  
227 1 M NaCl, pH 8), and eluted (25 mM Tris, 1 M NaCl, 400 mM imidazole, pH 8). The  
228 eluate was concentrated and the NaCl concentration of the sample was adjusted to 100

229 mM using 25 mM Tris, pH 8. Then, the sample was loaded onto a HiTrap Heparin HP  
230 column (Sigma) using an increasing NaCl gradient from 200 mM to 1M. Fractions  
231 containing the HMPV N protein were buffer exchanged and stored as described above.

232 **Expression and purification of HMPV N K171A/R186A.** The CAN97-83 HMPV  
233 N mutant was generated using QuikChange site-directed mutagenesis in pUC57 and  
234 subcloned into pET29b(+) using BamHI and XbaI cleavage sites. The construct was  
235 expressed, induced, lysed, and spun as described for N<sup>0</sup>-P. The crude lysate was loaded  
236 onto a column containing resin as described for N-RNA, and the resin was washed once  
237 with 20 mM Tris, 500 mM NaCl, 10 mM imidazole, pH 7 and once with 20 mM Tris, 500  
238 mM NaCl, pH 7. The protein was eluted with 20 mM Tris, 500 mM NaCl, 300 mM  
239 imidazole, pH 7. The eluate was concentrated and the NaCl concentration of the sample  
240 was adjusted to 100 mM using 20 mM Tris, pH 7. Then, the sample was heparin purified  
241 as described for N-RNA. Fractions were buffer exchanged and stored as described  
242 above.

243 **Protein labeling.** Prior to buffer exchange, purified HMPV N<sup>0</sup>-P was labeled with  
244 Alexa 488 TFP ester (ThermoFisher). The Alexa 488 TFP ester was prepared with  
245 DMSO to make a 10 mg/mL solution. The solution was added dropwise to the protein  
246 sample. The sample rocked for 1 hr in the dark and was buffer exchanged and stored  
247 as described above. Anion exchange purified HMPV P was labeled in a similar manner  
248 using Alexa 594 NHS ester (ThermoFisher).

249 **Droplet assay.** A 20% dextran solution was prepared in 25 mM HEPES, 150 mM  
250 KCl, pH 7.5. DTT was added to the dextran solution to give a final concentration of 1  
251 mM. HMPV protein constructs were diluted in the 20% dextran, 1 mM DTT, 25 mM  
252 HEPES, 150 mM KCl, pH 7.5 solution in 1.5 mL Eppendorf tubes. This solution was

253 used in samples for standard droplet imaging, fusion droplet imaging, and in turbidity  
254 assays. For the HMPV P samples tested at different KCl concentrations, similar buffers  
255 were prepared with KCl ranging from 0 mM to 500 mM. 1.5  $\mu$ L of sample was plated on  
256 an 8-well printed microscopy slide and covered with a glass coverslip. For droplets  
257 imaged at later time points, the slides were stored in a humidified chamber.

258 **Droplet microscopy imaging.** HMPV purified protein samples were imaged  
259 using either DIC or epifluorescence on a Nikon Eclipse E600 with the 60X objective.  
260 Fusion time lapse images were acquired with MetaMorph software using DIC on a Zeiss  
261 Axiovert 200M with the 100X oil objective. Images were acquired at 0.3 sec or 0.5 sec  
262 intervals.

263 **RNA oligomer.** The fluorescent RNA decamer was purchased from Integrated  
264 DNA Technologies. It was terminated with OH at the 5' end and 6-carboxyfluorescein at  
265 the 3' end.

266 **Turbidity assay.** Protein solutions were mixed with 20% dextran, 1 mM DTT, 25  
267 mM HEPES, 150 mM KCl, pH 7.5 in clear 96-well plates. The final concentration of the  
268 protein was 40  $\mu$ M. The absorbance of the solutions was measured on a SpectraMax  
269 iD3 at 395 nm (21). Readings were taken at 5 min intervals for 8 hr or longer.

270 **Live cell imaging.** VeroE6 cells were seeded in 12 well glass-bottom culture  
271 plates and the day after infected with HMPV-mCherryP using a MOI of 3. Cells were  
272 kept at 37°C in a 5% CO<sub>2</sub> atmosphere until imaging. Images were acquired in a  
273 LionHeartFX fluorescence microscope using a 60X oil immersion objective. At 24, 48  
274 and 72 hpi infected cultures were imaged for 10 minutes, with images taken every 30  
275 seconds. At least 5 different infected cells were imaged per condition. Alternatively, Vero  
276 cells were electroporated with 100 ng of a plasmid encoding mCherryP using a Neon

277 system (ThermoFisher), pulsed at 220V and 950  $\mu$ F, and subsequently seeded in 6 well  
278 glass bottom culture plates. Twenty-four hours post electroporation, cells were infected  
279 with rgHMPV at a MOI of 3 and kept for another 48 hours at 37°C in a 5% CO<sub>2</sub>  
280 atmosphere. Cells were imaged in a NikonA1 confocal microscope, acquiring images  
281 every 25 seconds using the 60X oil immersion objective.

282

283

## 284 RESULTS

285 **HMPV P localizes to liquid-like IBs in transfected and infected cells.** During  
286 HMPV infection, incoming and newly synthesized ribonucleoproteins concentrate  
287 together in the cytoplasm in an actin-dependent manner (10, 35). Eventually, the  
288 coalescence of these structures induces the formation of IBs where viral RNA, viral  
289 mRNA, P protein, and N protein are detected (10). Inhibition of actin polymerization  
290 significantly reduces HMPV genome transcription and replication, suggesting that IB  
291 coalescence enhances the efficiency of these processes (10). To gain insights into IB  
292 dynamics in HMPV-infected cells, we generated a recombinant virus with a N-terminus  
293 mCherry tagged P protein. mCherry-P retained at least 60% of activity in minireplicon  
294 assays, while tagging P on its C-terminus resulted in deleterious effects (data not  
295 shown). To characterize the growth kinetics of the recombinant HMPV-mCherryP virus,  
296 Vero cells were infected at a MOI of 0.1 PFU/cell. Infected cells were maintained in  
297 presence (TPCK+) or absence (TPCK-) of trypsin until 16 days post-infection. Viral titers  
298 from supernatants increased until day 10, after which virus growth reached a plateau  
299 (FIG. 1A). As expected, HMPV did not grow efficiently in the absence of TPCK trypsin  
300 (FIG. 1A). Viral titers for the recombinant HMPV-mCherryP virus were slightly lower than  
301 what previously reported for the recombinant JPS02-76EGFP virus (Shirogane, 2008),  
302 but this was expected since the mCherryP protein did not retain full replicative activity.  
303 It was previously shown that IBs coalesce to a small number of larger structures over  
304 the early part of infection, and that this process correlates with maximization of  
305 replication efficiency (10). In agreement with this, low numbers of IBs were detected in  
306 HMPV-mCherryP infected cells at 24 – 72 hours post infection (hpi) (FIG. 1B). In  
307 addition, the size of IBs was shown to nearly double from 2  $\mu\text{m}$  to almost 4  $\mu\text{m}$  from 24

308 to 72 hpi (FIG. 1C), suggesting a maturation of IBs and potentially increased replication  
309 during this period. Using live cell imaging, frequent events of fusion and fission between  
310 IBs were observed (FIG. 1D, 1E, 1F). The frequency of fission events per cell  
311 significantly increased from 24 to 72 hpi (FIG. 1E), coinciding with the increase in size  
312 observed at these hpi. Additionally, incorporation of mCherryP into IBs was observed in  
313 mCherryP electroporated - rgHMPV infected cells (FIG. 1G). Fusion and fission events  
314 of the IBs in these transfected-infected cells was observed using live-cell imaging,  
315 suggesting that HMPV P has an inherent propensity to be incorporated into IBs.  
316 Altogether, our results suggest that as infection progress, HMPV IBs grow and increase  
317 in complexity and dynamic behavior.

318 The liquid-like nature of HMPV IB-like structures was analyzed in transfected  
319 cells using FRAP to compare fluorescence recovery rates. When cells were transfected  
320 with HMPV P alone, the P protein showed diffuse cytosolic localization and rapid  
321 fluorescence recovery (FIG 2). Alternatively, when cells were transfected with both  
322 HMPV N and P to induce IB-like structure formation, HMPV P fluorescence recovery  
323 rates in the region of the IB were reduced but recovery was still observed, consistent  
324 with what is expected for membrane-less liquid-like organelles. This suggests that  
325 interactions between HMPV N and P lead to changes in cellular protein dynamics to  
326 form phase separated regions. Together, these results support the characterization of  
327 HMPV IBs as liquid organelles formed by LLPS as sites for efficient replication and  
328 transcription.

329 **HMPV P phase separates independently *in vitro*.** Since the HMPV N and P  
330 proteins are the minimum requirements for IB-like structure formation in eukaryotic cells,  
331 recombinant versions of the proteins were expressed in *E. coli* and purified for *in vitro*

332 analysis. Full-length, His<sub>6</sub>-tagged HMPV P was purified by immobilized metal affinity  
333 chromatography (IMAC) followed by anion exchange chromatography. Purified HMPV  
334 P was then tested in the presence of the crowding agent dextran to assess its ability to  
335 undergo LLPS. LLPS is typically driven by scaffold proteins with specific features that  
336 promote multivalent interactions with other proteins or RNA (36-38). HMPV P, which  
337 includes long IDRs and alternating charged regions, fits the criteria of an LLPS scaffold  
338 protein (28). Unlike the reports for MeV and RSV, purified HMPV P formed liquid droplets  
339 in the absence of N that were visualized using differential interference contrast (DIC)  
340 microscopy, and droplet formation was dependent on the concentration of the P protein  
341 (FIG. 3A). Time lapse imaging of the HMPV P droplets showed that they underwent  
342 fusion, consistent with the idea that they possess a liquid nature (FIG. 3B). A turbidity  
343 assay was also used to analyze purified HMPV P phase separation. The absorbance of  
344 the purified HMPV P protein solution was measured at 395 nm at different time points  
345 to detect LLPS. The measurements showed a peak for the absorbance above 0.12  
346 between two and four hours, supporting the microscopy imaging results that HMPV P  
347 phase separates in the absence of other viral protein binding partners (FIG. 3C).

348 **Interactions with nucleic acid modulate HMPV P phase separation**  
349 **dynamics.** Using the protein purification protocol described above, we noticed that the  
350 A260/280 ratio was approximately 1.08, suggesting that the HMPV P protein sample  
351 contained nucleic acid. Since nucleic acids are known to play a role in LLPS, we utilized  
352 an alternative purification protocol to determine if removing the nucleic acid would  
353 influence HMPV P liquid droplet formation. The alternative protocol included treatment  
354 with Benzonase nuclease and an IMAC purification step followed by a heparin affinity  
355 column purification. This method was successful in removing some of the nucleic acid

356 as indicated by the decreased A260/280 ratio of 0.85. Interestingly, DIC microscopy  
357 analysis showed that the recombinant HMPV P protein purified by our alternative  
358 protocol formed larger liquid droplets than the original protein sample (FIG. 4A). In  
359 addition, time lapse imaging analysis showed that the liquid droplets were capable of  
360 fusing (FIG. 4B). Turbidity assay results for the heparin purified HMPV P protein were  
361 similar to previous samples, with a peak above 0.12 between two and four hours (FIG.  
362 4C). These results suggest that the presence of increased levels of nucleic acid  
363 modulate HMPV P phase separation dynamics. Charge interactions are known to  
364 influence phase separation and nucleic acid binding, so both versions of purified HMPV  
365 P (anion exchange purified and heparin purified) were analyzed for liquid droplet  
366 formation using buffers with different concentrations of potassium chloride (KCl) ranging  
367 from 0 to 500 mM. For the anion exchange purified HMPV P, liquid droplets were easily  
368 detected between 150 and 250 mM KCl. However, droplet formation was inhibited at  
369 concentrations below or above that range (FIG. 5). In contrast, the heparin purified P  
370 protein was able to form droplets with as little as 100mM KCl, and as much as 500mM  
371 KCl (FIG 5.). For the heparin purified HMPV P, the largest droplets formed at 150 mM  
372 KCl droplet size ranging from 0.5-5 $\mu$ m, with an average of 0.64  $\mu$ m. Average IB size was  
373 lower, comparatively, in 250mM salt (average droplet size of 2.5  $\mu$ m), and similar results  
374 were observed at the 500mM concentration. The anion exchanged protein also formed  
375 the largest droplets at the 150mM concentration with an average size of 2.36  $\mu$ m ranging  
376 from 0.57  $\mu$ m -6.8  $\mu$ m. Anion purified P protein also formed smaller droplets with  
377 increasing salt concentration above 150 mM, with an average diameter of 1.7  $\mu$ m at  
378 250mM KCl and 1  $\mu$ m at 300mM KCl. Droplets were consistently smaller for the anion  
379 exchange purified protein in contrast to the heparin purified product at comparable salt

380 concentrations. These results suggest that HMPV P protein samples containing higher  
381 levels of nucleic acid are more sensitive to changes in charge, thus leading to the  
382 disruption of liquid droplet formation *in vitro*.

383 **HMPV P recruits N<sup>0</sup>-P to liquid droplets.** WT HMPV N spontaneously  
384 oligomerizes and binds to nonspecific RNAs during standard purification procedures  
385 (30). Thus, we utilized a recombinant N<sup>0</sup>-P construct that includes full-length N (1-394)  
386 fused to a P peptide (1-40) to maintain N in a monomeric, RNA-free form for purified  
387 protein analysis (FIG. 6A), a strategy that had been successfully utilized by Renner et  
388 al. (30). The N<sup>0</sup>-P construct purified by IMAC formed gel-like structures that clumped  
389 together in irregular shapes that were visualized by DIC microscopy (FIG. 6B). Unlike  
390 anion exchange purified HMPV P, the gel-like HMPV N<sup>0</sup>-P structures remained partially  
391 undissolved in 500 mM KCl (data not shown). Over time, these gel-like structures  
392 aggregated together but did not undergo fusion (FIG. 6B). In agreement with our  
393 microscopy results, turbidity assays performed with the IMAC purified N<sup>0</sup>-P protein gave  
394 high absorbance readings that peaked above 0.6, further indicating that the gel-like  
395 structures were aggregating in solution (FIG. 6E). The subsequent drop in absorbance  
396 suggests that the aggregates settled to the bottom of the 96-well plate.

397 The N<sup>0</sup>-P construct was examined in combination with anion exchange purified  
398 HMPV P using a droplet assay to determine if the P protein could influence N<sup>0</sup>-P  
399 dynamics in solution. DIC and fluorescence microscopy analyses showed that mixing  
400 the two proteins led to enhanced LLPS as indicated by the presence of larger and more  
401 numerous droplets than we previously observed for HMPV P alone. N<sup>0</sup>-P and P were  
402 incorporated into the same liquid droplets, as indicated by the colocalization of the  
403 fluorescent signals used to label the proteins (FIG. 6C). In addition, the phase separated

404 droplets underwent fusion events (FIG. 6D). A turbidity assay was utilized to determine  
405 if combining N<sup>0</sup>-P with P affected the absorbance of the solution. The results showed  
406 that compared to N<sup>0</sup>-P alone, the combination of N<sup>0</sup>-P and P led to lower absorbance  
407 readings that peaked around 0.3 at two hours (FIG. 6E). Together, these findings  
408 support that HMPV P facilitates interactions with N<sup>0</sup>-P to recruit the protein into liquid  
409 droplets, and interactions between the proteins prevent the N<sup>0</sup>-P construct from  
410 transitioning to a gel-like state.

411 **HMPV P recruits N-RNA rings to liquid droplets.** In addition to the monomeric  
412 N<sup>0</sup>-P construct, WT N-RNA rings were purified for LLPS analysis in the presence or  
413 absence of HMPV P. DIC imaging of N-RNA rings in the droplet assay showed the  
414 formation of clumped, irregularly-shaped structures that did not undergo fusion,  
415 suggesting that this protein-RNA complex does not form liquid-like phase separated  
416 structures independently (FIG. 7A). Combining the purified N-RNA rings with heparin  
417 purified HMPV P resulted in N-RNA complex incorporation into liquid droplets (FIG. 7B).  
418 The N-RNA/P droplets (maximum droplet size = 6 μm) were generally smaller than the  
419 P alone droplets (maximum droplet size = 11 μm), suggesting that this combination  
420 influences phase separation dynamics. The influence of HMPV P on N-RNA for liquid  
421 droplet formation was reflected in the turbidity assay results which showed a lower peak  
422 for absorbance around 0.2 at two hours, compared to the absorbance for N-RNA alone  
423 (FIG. 7D).

424 HMPV P and N-RNA were tested in our *in vitro* system at different ratios to  
425 determine the conditions that were required for N-RNA to be recruited to liquid droplets.  
426 Though N-RNA aggregates were still present at 4:1 and 2:1 ratios of N-RNA/P, round  
427 droplets were easily detected at a 1:1 ratio. The number and size of the round droplets

428 increased in samples with a higher proportion of HMPV P (1:2 and 1:4) (FIG. 7C). These  
429 results suggest that a specific ratio of N-RNA/P must be met before N-RNA is induced  
430 to phase separate into droplets. Liquid droplets containing HMPV P and N-RNA were  
431 also shown to incorporate a fluorescent RNA oligomer (FIG. 7E). These findings  
432 highlight that HMPV P, N, and RNA form complex multivalent interactions to promote  
433 phase separation and to support the structure of IBs required to enhance replication and  
434 transcription.

435 **HMPV P recruits RNA-binding mutant N K171A/R186A to gel-like droplets.**

436 An HMPV N mutant (K171A/R186A) was generated to determine if RNA binding affects  
437 N recruitment into droplets. This mutant was designed based on the RSV construct N  
438 K170A/R185A which lacks the ability to bind RNA (39). HMPV N<sup>0</sup>-P, N-RNA, and N  
439 K171A/R186A were tested individually with a fluorescent RNA oligomer in a droplet  
440 assay to assess the RNA-binding capabilities of the different constructs. The RNA  
441 oligomer incorporated into N<sup>0</sup>-P structures, suggesting that the RNA may disrupt binding  
442 of the P<sub>1-40</sub> peptide to N (FIG. 8A). Alternatively, the P<sub>1-40</sub> peptide, which contains  
443 positively charged residues, may interact directly with the RNA oligomer. In contrast to  
444 N<sup>0</sup>-P, N-RNA showed a weak interaction with the fluorescent RNA oligomer, suggesting  
445 that oligomer poorly disrupts the existing interactions between HMPV N and RNA in  
446 stable ring structures (FIG. 8A). The N K171A/R186A mutant showed no colocalization  
447 with the fluorescent RNA oligomer, suggesting that mutation of these residues in the  
448 RNA-binding cleft of HMPV N effectively inhibits RNA binding (FIG. 8A).

449 Subsequently, HMPV N K171A/R186A was tested at different ratios with heparin  
450 purified HMPV P in a droplet assay to analyze LLPS dynamics (FIG. 8B). At a 4:1 ratio  
451 of N K171A/R186A:P, microscopy imaging showed the presence of aggregates and no

452 liquid droplets. Droplets became visible as the concentration of HMPV P was increased  
453 relative to the N RNA-binding mutant. However, the droplets exhibited gel-like features,  
454 and droplets were seen to adhere to each other (white arrowheads, FIG. 8A) but were  
455 unable to undergo fusion. This suggests that RNA binding to HMPV N plays an important  
456 role in modulating LLPS dynamics *in vitro* and support our model that HMPV P, N, and  
457 RNA form complex interactions in cells to promote replication and transcription.

458

459

460

## DISCUSSION

461 IB formation has been reported for many negative-strand viruses across the  
462 *Mononegavirales* order (40). Recent evidence supports that these structures function as  
463 viral factories by concentrating the materials required for replication and transcription.  
464 Cellular studies of IBs have shown that these structures are membrane-less and  
465 dynamic, which led to the characterization of IBs as liquid organelles. Though  
466 membrane-less organelles have been recognized in the cell for decades, scientists have  
467 only recently linked the formation of these structures to the process of LLPS.  
468 Understanding the role of LLPS in IB formation may be critical for discovering new  
469 targets for pan-antiviral development. Until now, no reports have been published to  
470 determine if HMPV IBs are consistent with phase separated liquid organelles. Cellular  
471 experiments were utilized to analyze the dynamic nature of HMPV IBs in infected or  
472 transfected cells. Additionally, *in vitro* experiments were performed to test recombinant  
473 versions of HMPV purified proteins in LLPS assays. These studies provide strong  
474 evidence for the novel role of HMPV P as a scaffold for recruiting N protein and other  
475 components to IBs.

476 Cellular analysis of HMPV IBs using live cell imaging and FRAP showed that  
477 these structures form as distinct phase separated regions that exchange components  
478 with the surrounding cytoplasm and undergo fusion and fission. Interestingly, our  
479 analysis of cells infected with recombinant HMPV-mCherryP virus showed that levels of  
480 IB fusion remained stable from 24 to 72 hpi, whereas fission events significantly  
481 increased during this time frame (FIG. 1). Since IB diameter increased significantly from  
482 24 to 72 hpi, this suggests that early fusion events and the incorporation of cellular  
483 components, newly synthesized HMPV proteins, and viral RNA contribute to the growth

484 of IBs over time. Furthermore, the plateau of fusion events suggests that IBs likely  
485 mature to a gel-like state by 72 hpi. In contrast, fission levels may be less affected by  
486 the gel-like state due to the activity of vesicles that traffic IB components out of large  
487 IBs, as we have observed via live cell imaging (data not shown). IB fission events may  
488 be linked to the release of small replication bodies to create new viral factories (11).  
489 Alternatively, fission may promote the formation of unique IB subpopulations later in  
490 infection to facilitate assembly and budding (41). These findings highlight the crucial role  
491 IBs likely play in establishing and promoting the spread of infection.

492 To analyze the protein interactions that govern IB formation, we compared  
493 purified HMPV P in the presence or absence of nucleic acid with a set of N forms using  
494 *in vitro* LLPS experiments. Importantly, we found that HMPV P phase separates  
495 independently *in vitro* and can act as a scaffold to recruit other client proteins, including  
496 HMPV N, to liquid droplets to drive LLPS. Additionally, our findings suggest a previously  
497 undescribed role for HMPV P in interacting with RNA to modulate phase separation. As  
498 the genome and antigenome of HMPV are fully coated by N, P could interact with viral  
499 mRNAs or with cellular RNAs in the context of an infection. Features of viral P proteins,  
500 including long regions of intrinsic disorder, match the molecular signature of proteins  
501 that phase separate under physiological conditions (24, 28). Furthermore, they are  
502 consistent with HMPV P as a scaffold protein that binds a variety of substrates, such as  
503 viral proteins and RNA, to promote IB formation. The recently published structure of the  
504 HMPV polymerase/P protein complex highlights the importance of IDRs in allowing  
505 HMPV P to adopt a variety of binding conformations (32, 42). The propensity for HMPV  
506 P to mediate multivalent interactions and phase separate independently *in vitro*  
507 suggests that it regulates similar functions for IB formation during infection (36).

508           In contrast to our *in vitro* results, the HMPV N and P proteins must be co-  
509 expressed in cells to generate IB-like structures (26). Without HMPV N, the P protein  
510 showed both diffuse cytoplasmic localization and peripheral filopodia-like localization  
511 (26). This difference between the cellular and *in vitro* systems suggests that host factors  
512 in the cytoplasm may block HMPV P interactions required to induce LLPS. Co-  
513 expression of HMPV P and N likely acts to initiate LLPS in cells by concentrating enough  
514 IB components to drive phase separation. LLPS is a highly sensitive process that  
515 depends on factors such as protein/RNA concentration, salt content, post-translational  
516 modifications, pH, and temperature (24). One or more of these factors may prevent  
517 HMPV P from phase separating when expressed independently in cells. Furthermore,  
518 results showed that removal of nucleic acid from purified HMPV P modulated liquid  
519 droplet formation *in vitro* (FIG. 5), suggesting that HMPV P phase separation in cells  
520 may be significantly impacted by the presence of RNA. Additionally, during HMPV  
521 infection, N protein is always expressed in excess compared to HMPV P due to the  
522 location of the N gene within the viral genome. This suggests that HMPV P may lack  
523 opportunities for independent phase separation during infection due the local  
524 concentration of other viral factors involved in IB formation. Though *in vitro* studies are  
525 crucial for deciphering the mechanisms of HMPV phase separation, the increased  
526 complexity of protein and RNA interactions during cellular infection must always be  
527 considered.

528           Our work is the first to provide evidence of a viral P protein functioning as a phase  
529 separation scaffold, in contrast to related systems. Recent reports on MeV and RSV  
530 showed that a combination of the N and P proteins was required to induce droplet  
531 formation *in vitro* (21, 22). Though *Mononegavirales* P proteins share common structural

532 features, they lack sequence similarity and vary in length (43). MeV P is 213 residues  
533 longer than HMPV P and includes a folded C-terminal (XD) domain after the unfolded  
534 P<sub>loop</sub>. The pneumoviral RSV and HMPV P proteins possess similar domain organization,  
535 but sequence differences likely promote unique LLPS interactions for each virus. For  
536 instance, HMPV P is 53 residues longer than RSV P and contains insertions in the N-  
537 terminal and C-terminal domains that may influence IDR behavior (43). The C-terminal  
538 domain and oligomerization domain of RSV P were required for liquid droplet formation  
539 with N-RNA, suggesting that the acidic insertion in the HMPV P C-terminal domain may  
540 modulate phase separation (22, 43). The differences observed for these viral systems  
541 emphasize that LLPS is highly dependent on multivalent interactions mediated by the  
542 unique composition of the P protein.

543         Though HMPV N and P are required for IB formation in cells, the role of different  
544 N protein forms in phase separation required further exploration. We compared  
545 monomeric N protein (N<sup>0</sup>-P) and N-RNA with N K171A/R186A to analyze the effects of  
546 oligomerization and RNA binding on LLPS with the HMPV P scaffold. Though all the N  
547 forms were recruited to droplets by HMPV P, the incorporation of N K171A/R186A led  
548 to the formation of droplets that failed to undergo complete fusion, suggesting that they  
549 were gel-like rather than liquid-like in nature. This highlights that RNA interactions with  
550 HMPV N and P alter phase separation dynamics and suggests that viral RNA levels may  
551 modulate IB maturation during the course of HMPV infection. A minimal MeV LLPS *in*  
552 *vitro* system showed that RNA diffuses into MeV N/P liquid droplets, triggering the  
553 formation of nucleocapsid-like particles (21). Interestingly, coexpression of a MeV N  
554 RNA-binding mutant with P did not alter the morphology of IB-like structures in cells  
555 compared to coexpression of WT N and P (20). These findings suggest that RNA binding

556 is not required for MeV IB formation, but RNA incorporation likely serves to enhance  
557 ribonucleoprotein assembly during infection. In contrast, a monomeric RNA-free RSV N  
558 mutant failed to form IB-like structures with RSV P in cells, suggesting that RSV N must  
559 oligomerize and/or bind RNA to mediate IB formation (22). Our *in vitro* results with HMPV  
560 N<sup>0</sup>-P and N K171A/R186A confirmed that N protein oligomerization and RNA  
561 interactions are not required for phase separation with HMPV P.

562         Here, we showed that HMPV IBs are liquid organelles and that HMPV P acts as  
563 a scaffold to recruit different forms of N to liquid droplets. We report that nucleic acid  
564 interactions with P and N alter phase separation dynamics, suggesting that viral RNA  
565 binding plays a significant role in HMPV IB formation and maturation. Recent work on  
566 RSV utilized a condensate-hardening drug to block RSV replication in the lungs of  
567 infected mice (44). This exciting evidence suggests that IBs of various negative-strand  
568 viruses may serve as druggable targets for inhibiting infection. The work presented here  
569 builds on the foundation for understanding the formation of IBs and the mechanisms that  
570 regulate LLPS for negative-strand viruses. Deciphering the protein and RNA interactions  
571 that influence IB phase separation will be essential for the development of pan-antiviral  
572 drugs to target viral factories.

## Acknowledgements

We are grateful to Max Renner, Oxford, for critical input on the construction and purification of the various HMPV N protein forms, and to Amanda Wilburn for technical assistance. Funding for this work was provided to NCM by Fondecyt grant 11180269 and to RED by NIAID grant RO1AI40758.

## References

1. van den Hoogen BG, de Jong JC, Groen J, Kuiken T, de Groot R, Fouchier RA, Osterhaus AD. 2001. A newly discovered human pneumovirus isolated from young children with respiratory tract disease. *Nat Med* 7:719-24.
2. Edwards KM, Zhu Y, Griffin MR, Weinberg GA, Hall CB, Szilagyi PG, Staat MA, Iwane M, Prill MM, Williams JV. 2013. Burden of human metapneumovirus infection in young children. *N Engl J Med* 368:633-43.
3. Williams JV, Harris PA, Tollefson SJ, Halburnt-Rush LL, Pingsterhaus JM, Edwards KM, Wright PF, Crowe JE, Jr. 2004. Human metapneumovirus and lower respiratory tract disease in otherwise healthy infants and children. *N Engl J Med* 350:443-50.
4. Schildgen V, van den Hoogen B, Fouchier R, Tripp RA, Alvarez R, Manoha C, Williams J, Schildgen O. 2011. Human Metapneumovirus: lessons learned over the first decade. *Clin Microbiol Rev* 24:734-54.
5. Rima B, Collins P, Easton A, Fouchier R, Kurath G, Lamb RA, Lee B, Maisner A, Rota P, Wang L, Ictv Report C. 2017. ICTV Virus Taxonomy Profile: Pneumoviridae. *J Gen Virol* 98:2912-2913.
6. Kolesnikova L, Mühlberger E, Ryabchikova E, Becker S. 2000. Ultrastructural organization of recombinant Marburg virus nucleoprotein: comparison with Marburg virus inclusions. *J Virol* 74:3899-904.
7. Matsumoto S. 1962. Electron microscopy of nerve cells infected with street rabies virus. *Virology* 17:198-202.
8. Nakai T, Shand FL, Howatson AF. 1969. Development of measles virus in vitro. *Virology* 38:50-67.
9. Norrby E, Marusyk H, Orvell C. 1970. Morphogenesis of respiratory syncytial virus in a green monkey kidney cell line (Vero). *J Virol* 6:237-42.
10. Cifuentes-Muñoz N, Brantje J, Slaughter KB, Dutch RE. 2017. Human Metapneumovirus Induces Formation of Inclusion Bodies for Efficient Genome Replication and Transcription. *J Virol* 91.
11. Nikolic J, Le Bars R, Lama Z, Scrima N, Lagaudrière-Gesbert C, Gaudin Y, Blondel D. 2017. Negri bodies are viral factories with properties of liquid organelles. *Nat Commun* 8:58.

12. Rincheval V, Lelek M, Gault E, Bouillier C, Sitterlin D, Blouquit-Laye S, Galloux M, Zimmer C, Eleouet JF, Rameix-Welti MA. 2017. Functional organization of cytoplasmic inclusion bodies in cells infected by respiratory syncytial virus. *Nat Commun* 8:563.
13. Nanbo A, Watanabe S, Halfmann P, Kawaoka Y. 2013. The spatio-temporal distribution dynamics of Ebola virus proteins and RNA in infected cells. *Sci Rep* 3:1206.
14. Ma D, George CX, Nomburg JL, Pfaller CK, Cattaneo R, Samuel CE. 2018. Upon Infection, Cellular WD Repeat-Containing Protein 5 (WDR5) Localizes to Cytoplasmic Inclusion Bodies and Enhances Measles Virus Replication. *J Virol* 92.
15. Zhang S, Jiang Y, Cheng Q, Zhong Y, Qin Y, Chen M. 2017. Inclusion Body Fusion of Human Parainfluenza Virus Type 3 Regulated by Acetylated  $\alpha$ -Tubulin Enhances Viral Replication. *J Virol* 91.
16. Carlos TS, Young DF, Schneider M, Simas JP, Randall RE. 2009. Parainfluenza virus 5 genomes are located in viral cytoplasmic bodies whilst the virus dismantles the interferon-induced antiviral state of cells. *J Gen Virol* 90:2147-56.
17. Lahaye X, Vidy A, Pomier C, Obiang L, Harper F, Gaudin Y, Blondel D. 2009. Functional characterization of Negri bodies (NBs) in rabies virus-infected cells: Evidence that NBs are sites of viral transcription and replication. *J Virol* 83:7948-58.
18. Heinrich BS, Cureton DK, Rahmeh AA, Whelan SP. 2010. Protein expression redirects vesicular stomatitis virus RNA synthesis to cytoplasmic inclusions. *PLoS Pathog* 6:e1000958.
19. Heinrich BS, Maliga Z, Stein DA, Hyman AA, Whelan SPJ. 2018. Phase Transitions Drive the Formation of Vesicular Stomatitis Virus Replication Compartments. *mBio* 9.
20. Zhou Y, Su JM, Samuel CE, Ma D. 2019. Measles Virus Forms Inclusion Bodies with Properties of Liquid Organelles. *J Virol* 93.
21. Guseva S, Milles S, Jensen MR, Salvi N, Kleman JP, Maurin D, Ruigrok RWH, Blackledge M. 2020. Measles virus nucleo- and phosphoproteins form liquid-like phase-separated compartments that promote nucleocapsid assembly. *Sci Adv* 6:eaaz7095.
22. Galloux M, Risso-Ballester J, Richard CA, Fix J, Rameix-Welti MA, Eléouët JF. 2020. Minimal Elements Required for the Formation of Respiratory Syncytial Virus Cytoplasmic Inclusion Bodies In Vivo and In Vitro. *mBio* 11.
23. Hyman AA, Weber CA, Jülicher F. 2014. Liquid-liquid phase separation in biology. *Annu Rev Cell Dev Biol* 30:39-58.
24. Alberti S, Gladfelter A, Mittag T. 2019. Considerations and Challenges in Studying Liquid-Liquid Phase Separation and Biomolecular Condensates. *Cell* 176:419-434.
25. Brangwynne CP, Mitchison TJ, Hyman AA. 2011. Active liquid-like behavior of nucleoli determines their size and shape in *Xenopus laevis* oocytes. *Proc Natl Acad Sci U S A* 108:4334-9.
26. Derdowski A, Peters TR, Glover N, Qian R, Utey TJ, Burnett A, Williams JV, Spearman P, Crowe JE. 2008. Human metapneumovirus nucleoprotein and

- phosphoprotein interact and provide the minimal requirements for inclusion body formation. *J Gen Virol* 89:2698-2708.
27. García J, García-Barreno B, Vivo A, Melero JA. 1993. Cytoplasmic inclusions of respiratory syncytial virus-infected cells: formation of inclusion bodies in transfected cells that coexpress the nucleoprotein, the phosphoprotein, and the 22K protein. *Virology* 195:243-7.
  28. Renner M, Paesen GC, Grison CM, Granier S, Grimes JM, Leyrat C. 2017. Structural dissection of human metapneumovirus phosphoprotein using small angle x-ray scattering. *Sci Rep* 7:14865.
  29. Leyrat C, Renner M, Harlos K, Grimes JM. 2013. Solution and crystallographic structures of the central region of the phosphoprotein from human metapneumovirus. *PLoS One* 8:e80371.
  30. Renner M, Bertinelli M, Leyrat C, Paesen GC, Saraiva de Oliveira LF, Huiskonen JT, Grimes JM. 2016. Nucleocapsid assembly in pneumoviruses is regulated by conformational switching of the N protein. *Elife* 5:e12627.
  31. Leyrat C, Renner M, Harlos K, Huiskonen JT, Grimes JM. 2014. Drastic changes in conformational dynamics of the antiterminator M2-1 regulate transcription efficiency in Pneumovirinae. *Elife* 3:e02674.
  32. Pan J, Qian X, Lattmann S, El Sahili A, Yeo TH, Jia H, Cressey T, Ludeke B, Noton S, Kalocsay M, Fearn R, Lescar J. 2020. Structure of the human metapneumovirus polymerase phosphoprotein complex. *Nature* 577:275-279.
  33. El Najjar F, Cifuentes-Muñoz N, Chen J, Zhu H, Buchholz UJ, Moncman CL, Dutch RE. 2016. Human metapneumovirus Induces Reorganization of the Actin Cytoskeleton for Direct Cell-to-Cell Spread. *PLoS Pathog* 12:e1005922.
  34. Shirogane Y, Takeda M, Iwasaki M, Ishiguro N, Takeuchi H, Nakatsu Y, Tahara M, Kikuta H, Yanagi Y. 2008. Efficient multiplication of human metapneumovirus in Vero cells expressing the transmembrane serine protease TMPRSS2. *J Virol* 82:8942-6.
  35. Cifuentes-Muñoz N, Ellis Dutch R. 2019. To assemble or not to assemble: The changing rules of pneumovirus transmission. *Virus Res* 265:68-73.
  36. Banani SF, Lee HO, Hyman AA, Rosen MK. 2017. Biomolecular condensates: organizers of cellular biochemistry. *Nat Rev Mol Cell Biol* 18:285-298.
  37. Shin Y, Brangwynne CP. 2017. Liquid phase condensation in cell physiology and disease. *Science* 357.
  38. Wheeler RJ, Hyman AA. 2018. Controlling compartmentalization by non-membrane-bound organelles. *Philos Trans R Soc Lond B Biol Sci* 373.
  39. Galloux M, Gabiane G, Sourimant J, Richard CA, England P, Moudjou M, Aumont-Nicaise M, Fix J, Rameix-Welti MA, Eléouët JF. 2015. Identification and characterization of the binding site of the respiratory syncytial virus phosphoprotein to RNA-free nucleoprotein. *J Virol* 89:3484-96.
  40. Nevers Q, Albertini AA, Lagaudrière-Gesbert C, Gaudin Y. 2020. Negri bodies and other virus membrane-less replication compartments. *Biochim Biophys Acta Mol Cell Res* 1867:118831.
  41. Ringel M, Heiner A, Behner L, Halwe S, Sauerhering L, Becker N, Dietzel E, Sawatsky B, Kolesnikova L, Maisner A. 2019. Nipah virus induces two inclusion body populations: Identification of novel inclusions at the plasma membrane. *PLoS Pathog* 15:e1007733.

42. Babu MM. 2016. The contribution of intrinsically disordered regions to protein function, cellular complexity, and human disease. *Biochem Soc Trans* 44:1185-1200.
43. Cardone C, Caseau CM, Pereira N, Sizun C. 2021. Pneumoviral Phosphoprotein, a Multidomain Adaptor-Like Protein of Apparent Low Structural Complexity and High Conformational Versatility. *Int J Mol Sci* 22.
44. Risso-Ballester J, Galloux M, Cao J, Le Goffic R, Hontonnou F, Jobart-Malfait A, Desquesnes A, Sake SM, Haid S, Du M, Zhang X, Zhang H, Wang Z, Rincheval V, Zhang Y, Pietschmann T, Eléouët JF, Rameix-Welti MA, Altmeyer R. 2021. A condensate-hardening drug blocks RSV replication in vivo. *Nature* doi:10.1038/s41586-021-03703-z.

**Figure 1. Characterization of a recombinant HMPV-mCherryP virus.** (A) Vero cells were infected with a MOI of 0.1 and cells were kept in absence (TPCK-) or presence (TPCK+) of trypsin until day 16 post-infection. Virus was harvested from the cell supernatants every other day and titrated. Vero cells were infected with HMPV-mCherryP virus using a MOI of 3 to quantify the number of IBs per cell (B) and IB diameter (C) at different times post-infection. (D) Fusion and (E) fission events were counted in Vero cells infected with HMPV-mCherryP at a MOI of 3, during a lapse of 10 min. Images were acquired every 30 sec using a LionHeartFX fluorescence microscope. (F) Time-lapse microscopy of Vero cells infected with HMPV-mCherryP, highlighting fission events (upper panels, yellow arrowheads) and fusion events (lower panels, white arrowheads). (G) Vero cells were electroporated with a plasmid encoding mCherryP and subsequently infected with rgHMPV-GFP virus. Fourty eight hours post infection time-lapse microscopy was performed using a NikonA1 confocal microscope, with images acquired every 25 sec. Fusion (white arrowheads) and fission (yellow arrowheads) events are shown. Statistical analysis was performed using Student's t-test. \* $P < 0.1$ ; \*\* $p < 0.01$ .

**Figure 2. FRAP analysis of HMPV P protein in inclusion bodies and the cytosol.** (A) Vero cells were transfected with pCAGGS plasmid expressing mcherry-P only (P) or co-transfected with pCAGGS plasmids encoding mCherry-P and N protein (P+N). 24 hours post transfection, live cell confocal microscopy was used to perform FRAP at 37°C on punctate regions by drawing a region of interest (ROI) representing a whole inclusion body or an equivalent area in the cytosol with P protein only. FRAP data

were corrected for background, normalized and are represented as means from the recovery curves. (B) Live cell confocal images collected during FRAP, showing recovery profiles of inclusions 4 min post-bleaching. Bleaching was performed at 100% laser power.

**Figure 3. Anion exchange purified HMPV P phase separates independently *in vitro*.** (A) Anion exchanged purified HMPV P was tested at concentrations ranging from 5  $\mu$ M to 50  $\mu$ M in a droplet assay (maximum droplet size = 3.4  $\mu$ m). DIC microscopy imaging of droplets was performed with a 60X objective on a Nikon Eclipse E600. The scale bar is 10  $\mu$ m. (B) Time lapse imaging of anion exchange purified HMPV P (80  $\mu$ M) droplet fusion was acquired using a 100X oil objective on a Zeiss Axiovert 200M microscope. The scale bar is 5  $\mu$ m. (C) Anion exchange purified HMPV P (40  $\mu$ M) was mixed with turbidity assay buffer in a clear 96-well plate. The solution was analyzed using a SpectraMax iD3 to measure the absorbance at 395nm at 5 min intervals with mixing.

**Figure 4. Heparin purified HMPV P phase separates independently *in vitro*.**

Heparin purified HMPV P was tested at concentrations ranging from 5  $\mu$ M to 50  $\mu$ M in a droplet assay (maximum droplet size >50  $\mu$ m). DIC microscopy imaging of droplets was performed with a 60X objective on a Nikon Eclipse E600. The scale bar is 10  $\mu$ m. (B) Time lapse imaging of heparin purified HMPV P (150  $\mu$ M) droplet fusion was acquired using a 100X oil objective on a Zeiss Axiovert 200M microscope. The scale bar is 5  $\mu$ m. (C) Heparin purified HMPV P (40  $\mu$ M) was mixed with turbidity assay buffer in a clear 96-well plate. The solution was analyzed using a SpectraMax iD3 to measure the

absorbance at 395 nm at 5 min intervals with mixing.

**Figure 5. Interactions with nucleic acid modulate HMPV P phase separation**

**dynamics.** Anion exchange purified HMPV P (15  $\mu$ M) and heparin purified HMPV P (15  $\mu$ M) were tested in a droplet assay using buffers with different concentrations of KCl ranging from 0 mM to 500 mM. DIC microscopy imaging of droplets was performed with a 60X objective on a Nikon Eclipse E600. The scale bar is 10  $\mu$ m, and the magnification is the same for all images.

**Figure 6. HMPV P recruits N<sup>0</sup>-P to liquid droplets.** (A) Schematic of the N<sup>0</sup>-P construct which includes full-length HMPV N fused to the first 40 amino acids of HMPV P. (B) HMPV N<sup>0</sup>-P (15  $\mu$ M) was tested in a droplet assay. DIC images were acquired at different time points using a 60X objective on a Nikon Eclipse E600. The scale bar is 7  $\mu$ m. (C) HMPV N<sup>0</sup>-P (15  $\mu$ M) labeled with Alexa 488 TFP ester was mixed with anion exchange purified HMPV P (15  $\mu$ M) labeled with Alexa 594 NHS ester in a droplet assay. Fluorescence images were acquired using a 60X objective on a Nikon Eclipse E600. The scale bar is 10  $\mu$ m. (D) HMPV N<sup>0</sup>-P (50  $\mu$ M) was mixed with anion exchange purified HMPV P (50  $\mu$ M). Time lapse imaging of N<sup>0</sup>-P/P droplet fusion was acquired using a 100X oil objective on a Zeiss Axiovert 200M microscope. The scale bar is 10  $\mu$ m. (E) HMPV N<sup>0</sup>-P (40  $\mu$ M) was tested alone or with anion exchange purified HMPV P (40  $\mu$ M) in a turbidity assay. The protein solutions were plated in a clear 96-well plate with turbidity assay buffer, and the absorbance was measured at 395 nm by a SpectraMax iD3 at 5 min intervals.

**Figure 7. HMPV P recruits N-RNA rings to liquid droplets.** (A) HMPV N-RNA (25  $\mu\text{M}$ ) was tested in a droplet assay. DIC microscopy imaging of droplets was performed with a 60X objective on a Nikon Eclipse E600. The scale bar is 10  $\mu\text{m}$ . (B) HMPV N-RNA (15  $\mu\text{M}$ ) was mixed with heparin purified HMPV P (15  $\mu\text{M}$ ) in a droplet assay. DIC images were acquired using a 60X objective on a Nikon EclipseE600. The scale bar is 10  $\mu\text{m}$ . (C) HMPV N-RNA and heparin purified HMPV P were tested in a droplet assay at different ratios (4:1 = 20  $\mu\text{M}$  N-RNA: 5  $\mu\text{M}$  P; 2:1 = 10  $\mu\text{M}$  N-RNA: 5  $\mu\text{M}$  P; 1:1 = 5  $\mu\text{M}$  N-RNA: 5  $\mu\text{M}$  P; 1:2 = 5  $\mu\text{M}$  N-RNA: 10  $\mu\text{M}$  P; 1:4 = 5  $\mu\text{M}$  N-RNA: 20  $\mu\text{M}$  P). DIC microscopy imaging of droplets was performed as described above. (D) HMPV N-RNA (40  $\mu\text{M}$ ) was tested alone or with heparin purified HMPV P (40  $\mu\text{M}$ ) in a turbidity assay. The protein solutions were plated in a clear 96-well plate with turbidity assay buffer, and the absorbance was measured at 395 nm by a SpectraMax iD3 at 5 min intervals with mixing. (E) HMPV N-RNA (15  $\mu\text{M}$ ), heparin purified HMPV P (15  $\mu\text{M}$ ), and an RNA decamer tagged with 6-carboxyfluorescein on the 3' end (5  $\mu\text{M}$ ) were mixed and tested in a droplet assay. DIC and fluorescence microscopy imaging of droplets was performed as described above. The scale bar is 10  $\mu\text{m}$ .

**Figure 8. RNA-binding mutant HMPV N K171A/R186A forms gel-like droplets with P.** (A) HMPV N<sup>0</sup>-P, N-RNA, or N K171A/R186A (15  $\mu\text{M}$ ) were tested in a droplet assay with an RNA decamer tagged with 6-carboxyfluorescein on the 3' end (5  $\mu\text{M}$ ). DIC and fluorescence microscopy imaging was performed on a Zeiss Axiovert 200M with a 63X oil objective. The scale bar is 10  $\mu\text{m}$ . (B) HMPV N K171A/R186A and heparin purified

HMPV P were tested in a droplet assay at different ratios (4:1 = 20  $\mu$ M N K171A/R186A: 5  $\mu$ M P; 2:1 = 10  $\mu$ M N K171A/R186A: 5  $\mu$ M P; 1:1 = 5  $\mu$ M N K171A/R186A: 5  $\mu$ M P; 1:2 = 5  $\mu$ M N K171A/R186A: 10  $\mu$ M P; 1:4 = 5  $\mu$ M N K171S/R186A: 20  $\mu$ M P). DIC microscopy imaging of droplets was performed on a Zeiss Axiovert 200M with a 63X oil objective. White arrowheads indicate altered droplet fusion. The scale bar is 10  $\mu$ m.



**FIG 1. Characterization of a recombinant HMPV-mCherryP virus.** (A) Vero cells were infected with an MOI of 0.1 and cells were kept in absence (TPCK-) or presence (TPCK+) of trypsin until day 16 post-infection. Virus was harvested from the cell supernatants every other day and titrated. Vero cells were infected with HMPV-mCherryP virus using an MOI of 3 to quantify the number of IBs per cell (B) and IB diameter (C) at different times post-infection. (D) Fusion and (E) fission events were counted in Vero cells infected with HMPV-mCherryP at an MOI of 3, during a lapse of 10 min. Images were acquired every 30 sec using a Lion-HeartFX fluorescence microscope. (F) Time-lapse microscopy of Vero cells infected with HMPV-mCherryP, highlighting fission events (upper panels, yellow arrowheads) and fusion events (lower panels, white arrowheads). (G) Vero cells were electroporated with a plasmid encoding mCherryP and subsequently infected with rgHMPV-GFP virus. Forty eight hours post infection time-lapse microscopy was performed using a NikonA1 confocal microscope, with images acquired every 25 sec. Fusion (white arrowheads) and fission (yellow arrowheads) events are shown. Statistical analysis was performed using Student's t-test. \*P<0.1; \*\*p<0.01.

A



B



**FIG 2. FRAP analysis of HMPV P protein in inclusion bodies and the cytosol.** (A) Vero cells were transfected with pCAGGS plasmid expressing mCherry-P only (P) or co-transfected with pCAGGS plasmids encoding mCherry-P and N protein (P+N). 24 hours post transfection, live cell confocal microscopy was used to perform FRAP at 37°C on punctate regions by drawing a region of interest (ROI) representing a whole inclusion body or an equivalent area in the cytosol with P protein only. FRAP data were corrected for background, normalized and are represented as means from the recovery curves. (B) Live cell confocal images collected during FRAP, showing recovery profiles of inclusions 4 minutes post-bleaching. Bleaching was performed at 100% laser power.



**FIG 3. Anion exchange purified HMPV P phase separates independently *in vitro*.** (A) Anion exchanged purified HMPV P was tested at concentrations ranging from 5  $\mu\text{M}$  to 50  $\mu\text{M}$  in a droplet assay (maximum droplet size = 3.4  $\mu\text{m}$ ). DIC microscopy imaging of droplets was performed with a 60X objective on a Nikon Eclipse E600. The scale bar is 10  $\mu\text{m}$ . (B) Time lapse imaging of anion exchange purified HMPV P (80  $\mu\text{M}$ ) droplet fusion was acquired using a 100X oil objective on a Zeiss Axiovert 200M microscope. The scale bar is 5  $\mu\text{m}$ . (C) Anion exchange purified HMPV P (40  $\mu\text{M}$ ) was mixed with turbidity assay buffer in a clear 96-well plate. The solution was analyzed using a SpectraMax iD3 to measure the absorbance at 395 nm at 5 min intervals with mixing.



**FIG 4. Heparin purified HMPV P phase separates independently *in vitro*.** (A) Heparin purified HMPV P was tested at concentrations ranging from 5  $\mu\text{M}$  to 50  $\mu\text{M}$  in a droplet assay. DIC microscopy imaging of droplets was performed with a 60X objective on a Nikon Eclipse E600. The scale bar is 10  $\mu\text{m}$ . (B) Time lapse imaging of heparin purified HMPV P (150  $\mu\text{M}$ ) droplet fusion was acquired using a 100X oil objective on a Zeiss Axiovert 200M microscope. The scale bar is 5  $\mu\text{m}$ . (C) Heparin purified HMPV P (40  $\mu\text{M}$ ) was mixed with turbidity assay buffer in a clear 96-well plate. The solution was analyzed using a Spectra-Max iD3 to measure the absorbance at 395 nm at 5 min intervals.



**FIG 5. Interactions with nucleic acid modulate HMPV P phase separation dynamics.** Anion exchange purified HMPV P (15  $\mu$ M) and heparin purified HMPV P (15  $\mu$ M) were tested in a droplet assay using buffers with different concentrations of KCl ranging from 0 mM to 500 mM. DIC microscopy imaging of droplets was performed with a 60X objective on a Nikon Eclipse E600. The scale bar is 10  $\mu$ m, and the magnification is the same for all images.



**FIG 6. HMPV P recruits N<sup>0</sup>-P to liquid droplets.** (A) Schematic of the N<sup>0</sup>-P construct which includes full-length HMPV N fused to the first 40 amino acids of HMPV P. (B) HMPV N<sup>0</sup>-P (15  $\mu$ M) was tested in a droplet assay. DIC images were acquired at different time points using a 60X objective on a Nikon Eclipse E600. The scale bar is 7  $\mu$ m. (C) HMPV N<sup>0</sup>-P (15  $\mu$ M) labeled with Alexa 488 TFP ester was mixed with anion exchange purified HMPV P (15  $\mu$ M) labeled with Alexa 594 NHS ester in a droplet assay. Fluorescence images were acquired using a 60X objective on a Nikon Eclipse E600. The scale bar is 10  $\mu$ m. (D) HMPV N<sup>0</sup>-P (50  $\mu$ M) was mixed with anion exchange purified HMPV P (50  $\mu$ M). Time lapse imaging of N<sup>0</sup>-P/P droplet fusion was acquired using a 100X oil objective on a Zeiss Axiovert 200M microscope. The scale bar is 10  $\mu$ m. (E) HMPV N<sup>0</sup>-P (40  $\mu$ M) was tested alone or with anion exchange purified HMPV P (40  $\mu$ M) in a turbidity assay. The protein solutions were plated in a clear 96-well plate with turbidity assay buffer, and the absorbance was measured at 395 nm by a SpectraMax iD3 at 5 min intervals.



**FIG 7. HMPV P recruits N-RNA rings to liquid droplets.** (A) HMPV N-RNA (25  $\mu$ M) was tested in a droplet assay. DIC microscopy imaging of droplets was performed with a 60X objective on a Nikon Eclipse E600. The scale bar is 10  $\mu$ m. (B) HMPV N-RNA (15  $\mu$ M) was mixed with heparin purified HMPV P (15  $\mu$ M) in a droplet assay. DIC images were acquired using a 60X objective on a Nikon Eclipse E600. The scale bar is 10  $\mu$ m. (C) HMPV N-RNA and heparin purified HMPV P were tested in a droplet assay at different ratios (4:1 = 20  $\mu$ M N-RNA: 5  $\mu$ M P; 2:1 = 10  $\mu$ M N-RNA: 5  $\mu$ M P; 1:1 = 5  $\mu$ M N-RNA: 5  $\mu$ M P; 1:2 = 5  $\mu$ M N-RNA: 10  $\mu$ M P; 1:4 = 5  $\mu$ M N-RNA: 20  $\mu$ M P). DIC microscopy imaging of droplets was performed as described above. (D) HMPV N-RNA (40  $\mu$ M) was tested alone or with heparin purified HMPV P (40  $\mu$ M) in a turbidity assay. The protein solutions were plated in a clear 96-well plate with turbidity assay buffer, and the absorbance was measured at 395 nm by a SpectraMax iD3 at 5 min intervals with mixing. (E) HMPV N-RNA (15  $\mu$ M), heparin purified HMPV P (15  $\mu$ M), and an RNA decamer tagged with 6-carboxyfluorescein on the 3' end (5  $\mu$ M) were mixed and tested in a droplet assay. DIC and fluorescence microscopy imaging of droplets was performed as described above. The scale bar is 10  $\mu$ m.



**FIG 8. RNA-binding mutant HMPV N K171A/R186A forms gel-like droplets with P.** (A) HMPV N<sup>0</sup>-P, N-RNA, or N K171A/R186A (15 μM) were tested in a droplet assay with an RNA decamer tagged with 6-carboxyfluorescein on the 3' end (5 μM). DIC and fluorescence microscopy imaging was performed on a Zeiss Axiovert 200M with a 63X oil objective. The scale bar is 10 μm. (B) HMPV N K171A/R186A and heparin purified HMPV P were tested in a droplet assay at different ratios (4:1 = 20 μM N K171A/R186A: 5 μM P; 2:1 = 10 μM N K171A/R186A: 5 μM P; 1:1 = 5 μM N K171A/R186A: 5 μM P; 1:2 = 5 μM N K171A/R186A: 10 μM P; 1:4 = 5 μM N K171S/R186A: 20 μM P). DIC microscopy imaging of droplets was performed on a Zeiss Axiovert 200M with a 63X oil objective. White arrowheads indicate altered droplet fusion. The scale bar is 10 μm.
